# Supplementary material for: Impact of transport model resolution and a priori assumptions on inverse modeling of Swiss F-gas emissions
Source: Copernicus journal article supplement (doi:10.5194/acp-23-14159-2023), 2023-11-14
Supplement: Supplementary file 1 [file acp-23-14159-2023-supplement.pdf]

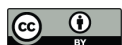

*Supplement of*

## **Impact of transport model resolution and a priori assumptions on inverse modeling of Swiss F-gas emissions**

**Ioannis Katharopoulos et al.**

*Correspondence to:* Ioannis Katharopoulos ([ioannis.katharopoulos@gmail.com](mailto:ioannis.katharopoulos@gmail.com)) and Stephan Henne ([stephan.henne@empa.ch](mailto:stephan.henne@empa.ch))

The copyright of individual parts of the supplement might differ from the article licence.

## S-1 Figures

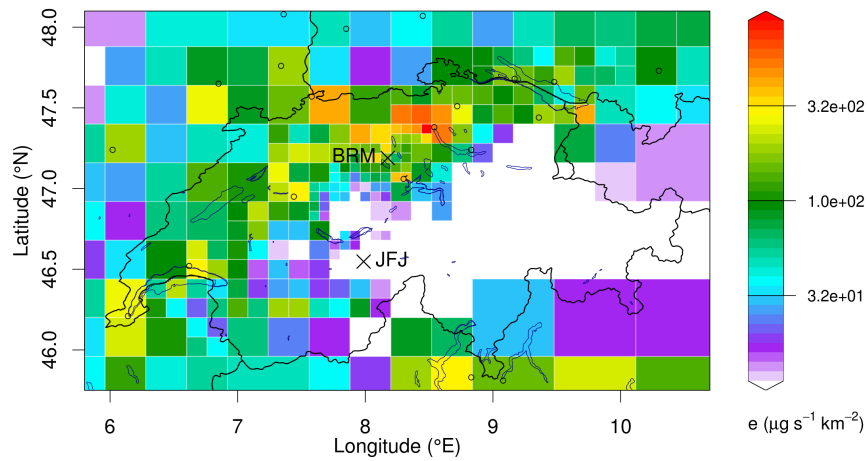

Figure S1: Spatial distribution of Swiss HFC-125 a-posteriori emissions for the base inversion (BRM and JFJ only included) for the period 2019–2020 with the 7 km model starting from a population based a-priori.

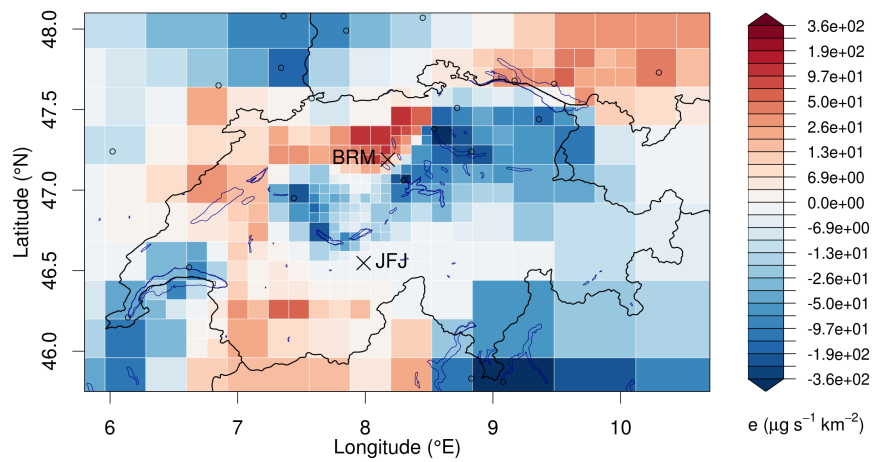

Figure S2: A-posteriori minus a-priori emission differences for HFC-125 for the base inversion with the 7 km model starting from a population based a-priori.

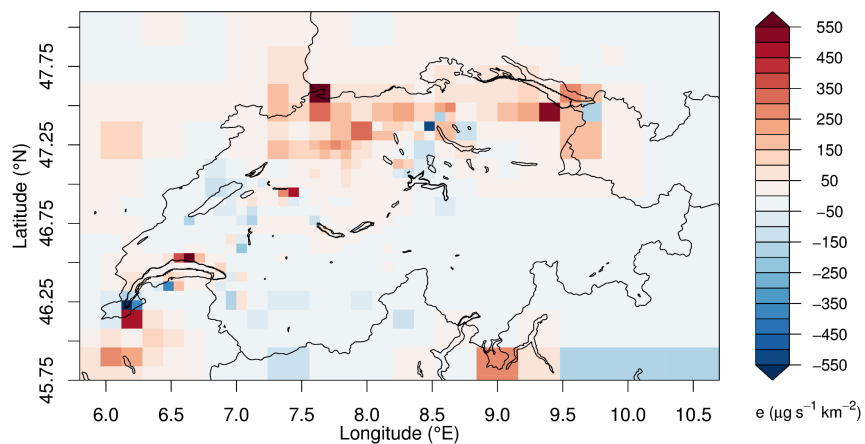

Figure S3: A-posteriori emission differences between the high- and low-resolution model inversions with population based a-priori for HFC-125

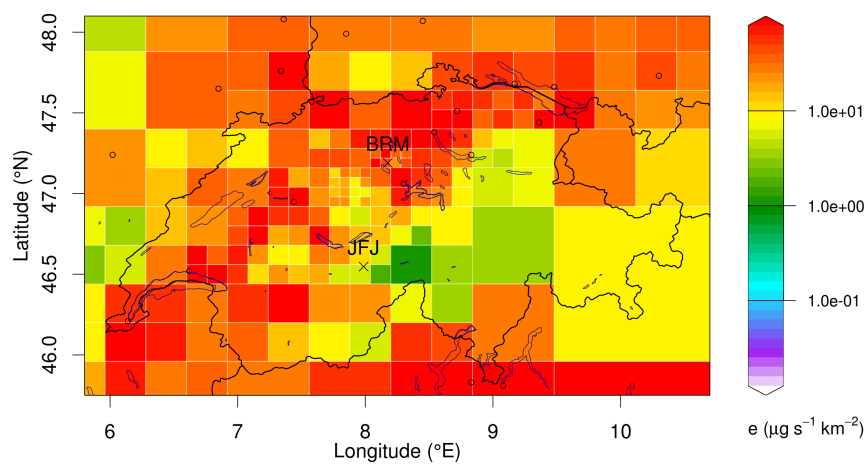

Figure S4: Spatial distribution of Swiss HFC-32 a-posteriori emissions for the base inversion (BRM and JFJ only included) for the period 2019–2020 with the 7 km model starting from a population based a-priori.

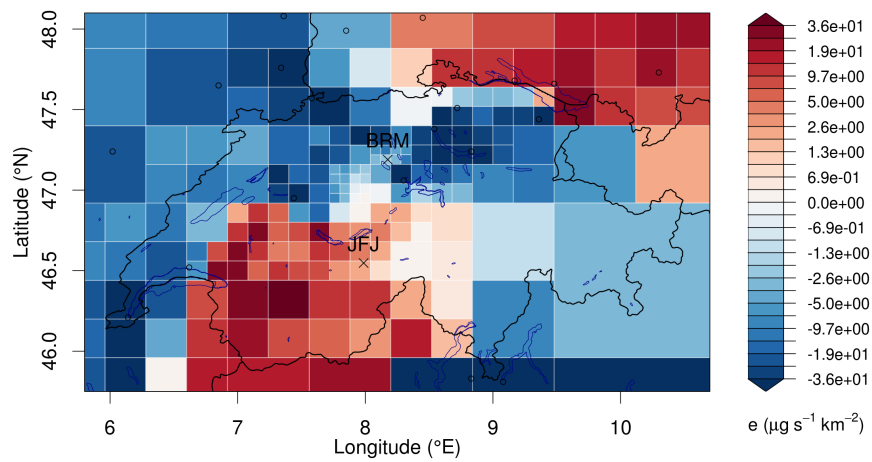

Figure S5: A-posteriori minus a-priori emission differences for HFC-125 for the base inversion with the 7 km model starting from a population based a-priori.

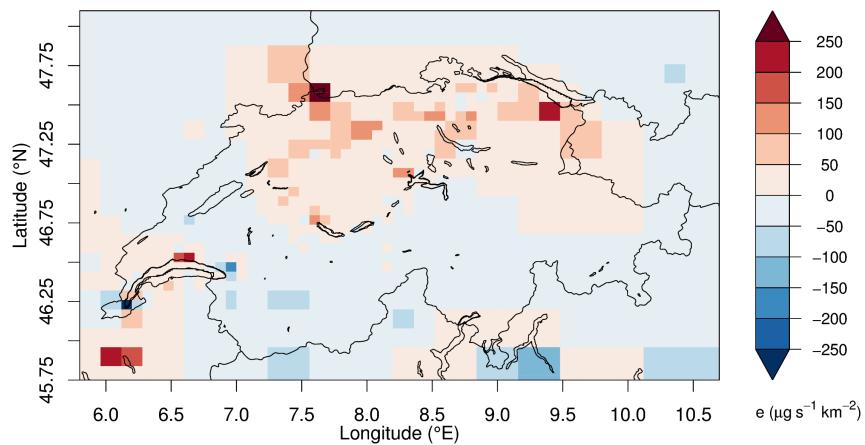

Figure S6: A-posteriori emission differences between the high- and low-resolution model inversions with population based a-priori for HFC-125

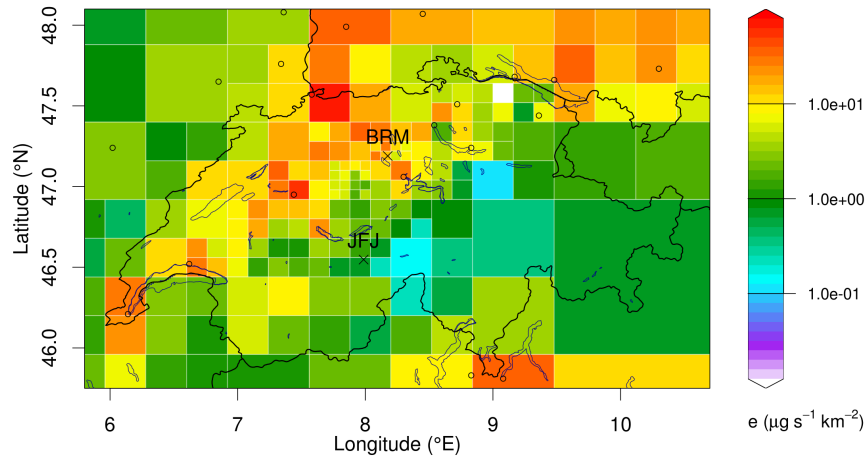

Figure S7: Spatial distribution of Swiss HFC-125 a-posteriori emissions for the base inversion (BRM and JFJ only included) for the period 2019–2020 with the 7 km model starting from a population based a-priori.

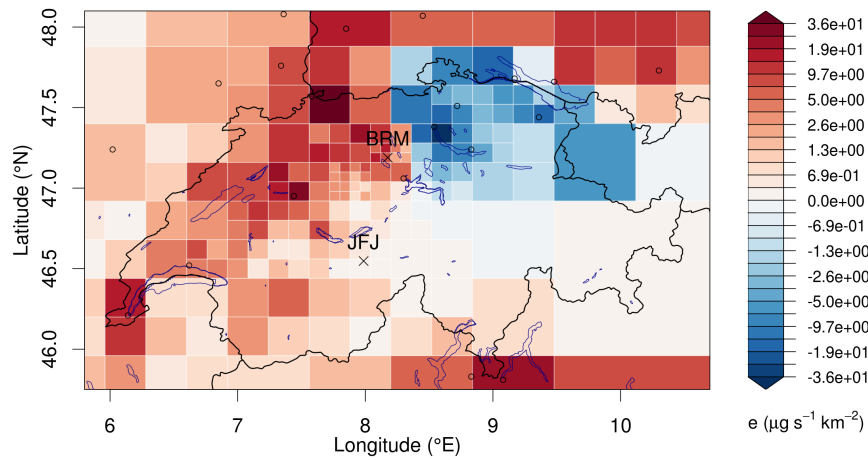

Figure S8: A-posteriori minus a-priori emission differences for HFC-125 for the base inversion with the 7 km model starting from a population based a-priori.

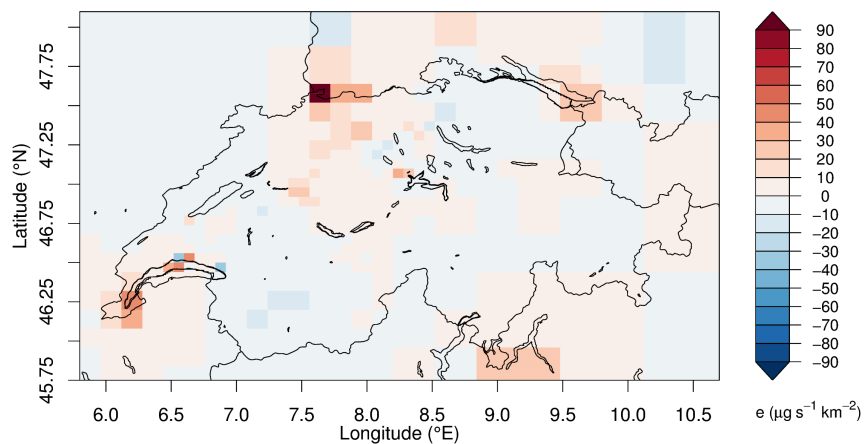

Figure S9: A-posteriori emission differences between the high- and low-resolution model inversions with population based a-priori for HFC-125

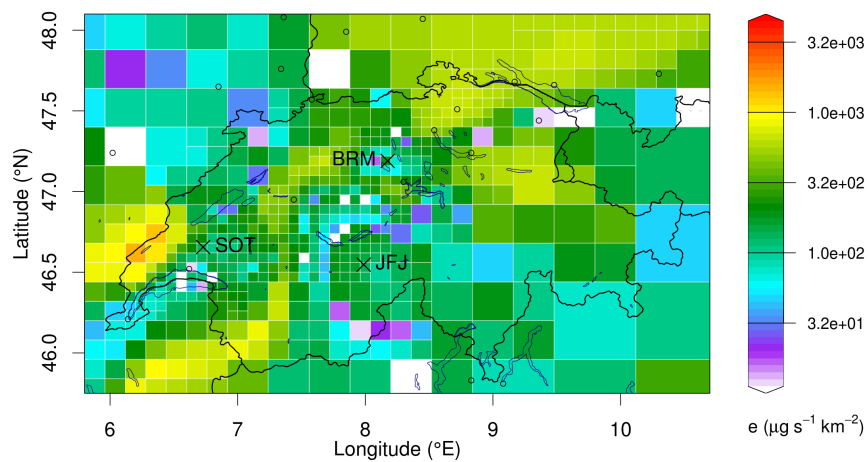

Figure S10: Spatial distribution of Swiss HFC-134a a-posteriori emissions for the inversion including both BRM and SOTT for the period 2019–2021 with the 7 km model starting from a uniform a-priori.

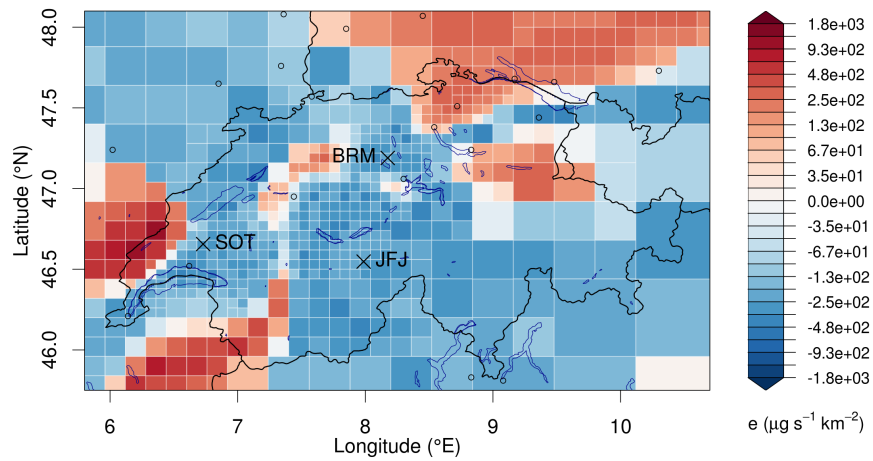

Figure S11: A-posteriori minus a-priori emission differences for HFC-134a for the inversion including both BRM and SOTT for the period 2019–2021 with the 7 km model starting from a uniform a-priori.

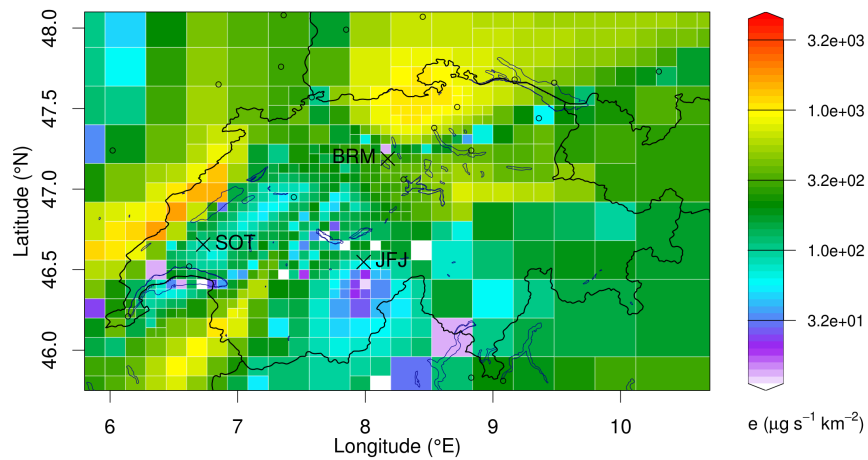

Figure S12: Spatial distribution of Swiss HFC-134a a-posteriori emissions for the inversion including both BRM and SOTT for the period 2019–2021 with the 1 km model starting from a uniform a-priori.



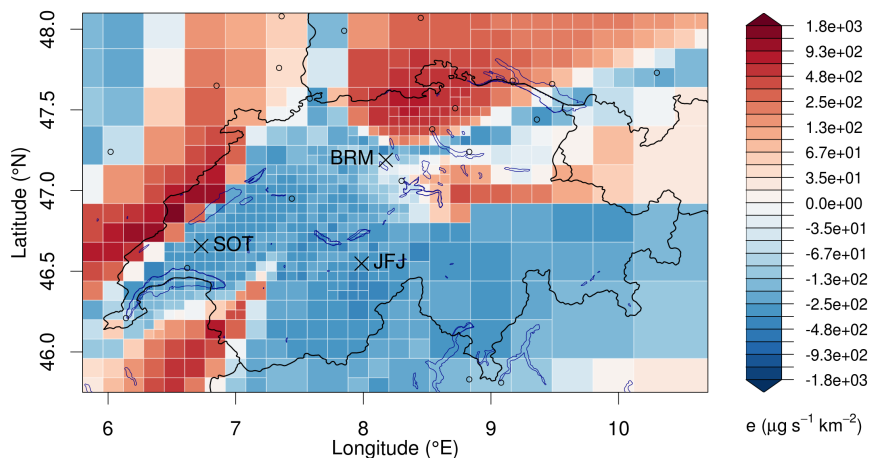

Figure S13: A-posteriori minus a-priori emission differences for HFC-134a for the inversion including both BRM and SOTT for the period 2019–2021 with the 1 km model starting from a uniform a-priori.

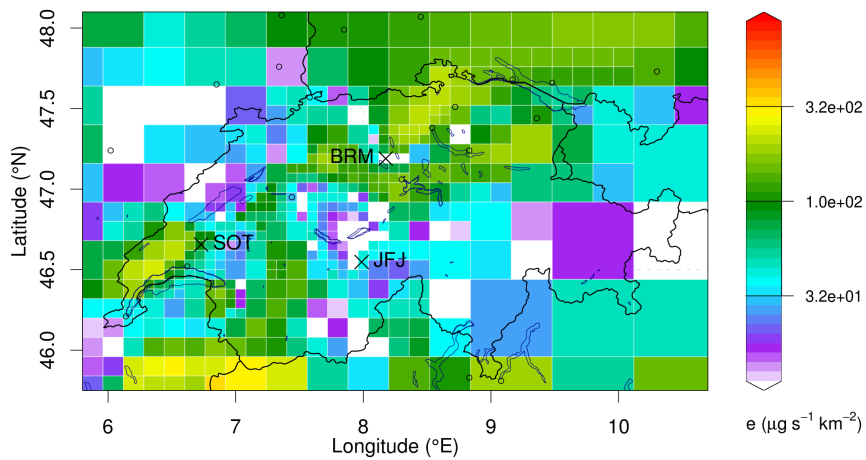

Figure S14: Spatial distribution of Swiss HFC-125 a-posteriori emissions for the inversion including both BRM and SOTT for the period 2019–2021 with the 7 km model starting from a uniform a-priori.

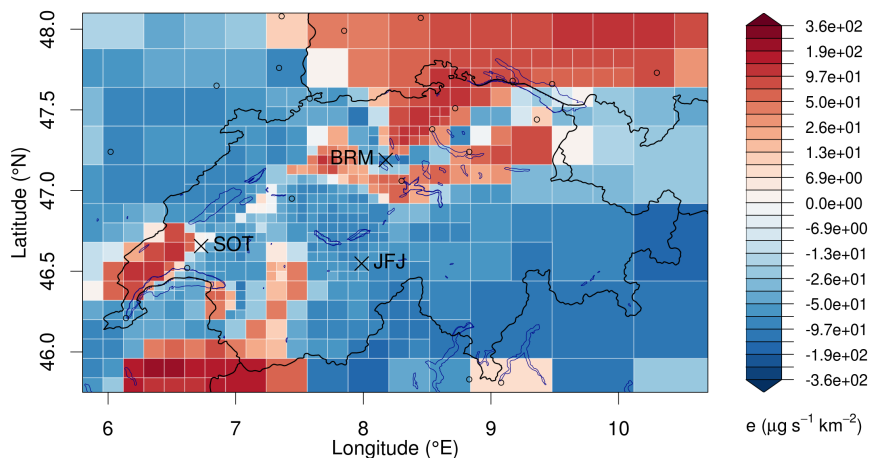

Figure S15: A-posteriori minus a-priori emission differences for HFC-125 for the inversion including both BRM and SOTT for the period 2019–2021 with the 7 km model starting from a uniform a-priori.

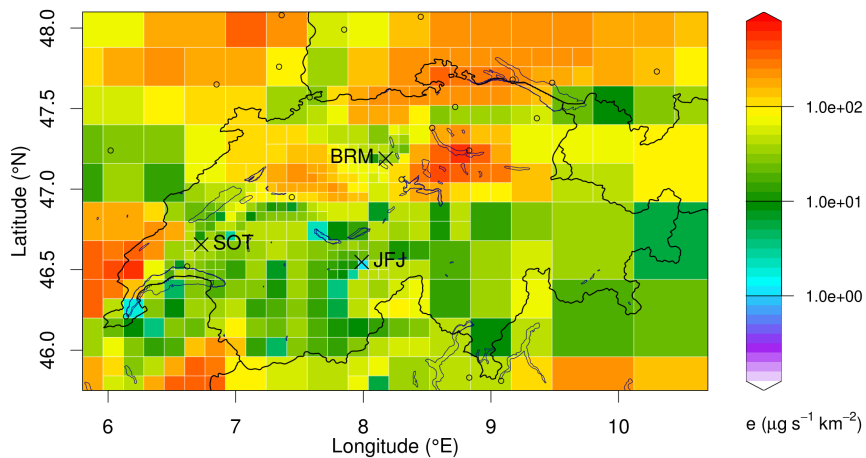

Figure S16: Spatial distribution of Swiss HFC-125 a-posteriori emissions for the inversion including both BRM and SOTT for the period 2019–2021 with the 1 km model starting from a uniform a-priori.

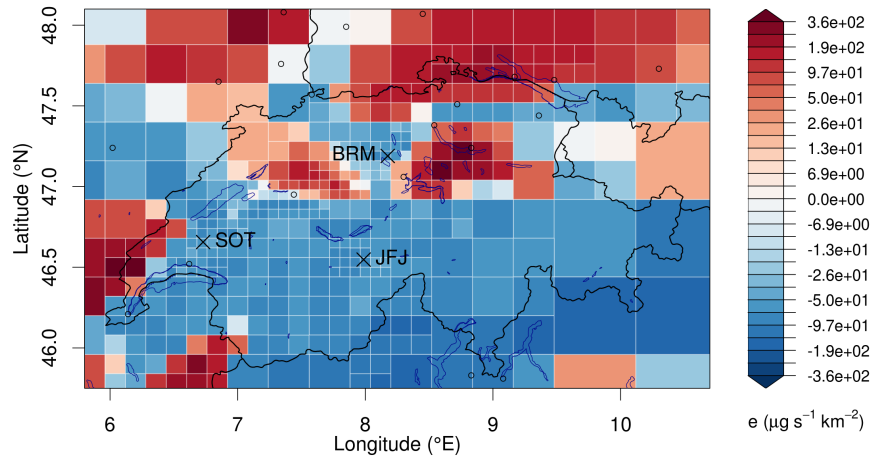

Figure S17: A-posteriori minus a-priori emission differences for HFC-125 for the inversion including both BRM and SOTT for the period 2019–2021 with the 1 km model starting from a uniform a-priori.

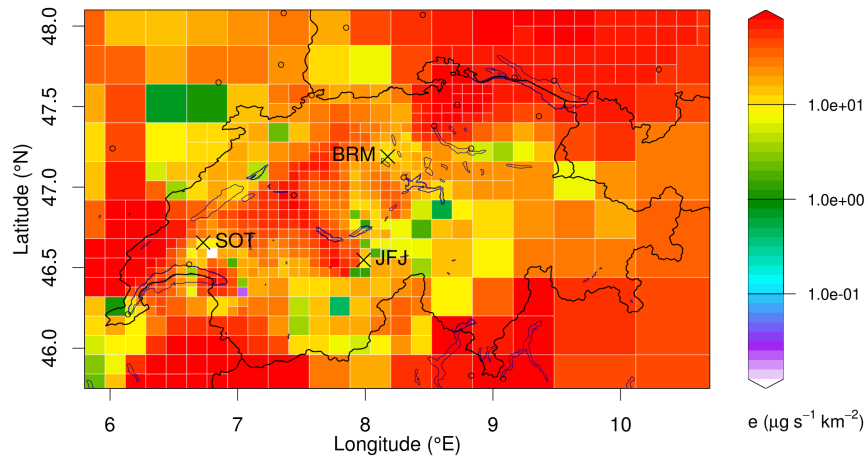

Figure S18: Spatial distribution of Swiss HFC-32 a-posteriori emissions for the inversion including both BRM and SOTT for the period 2019–2021 with the 7 km model starting from a uniform a-priori.

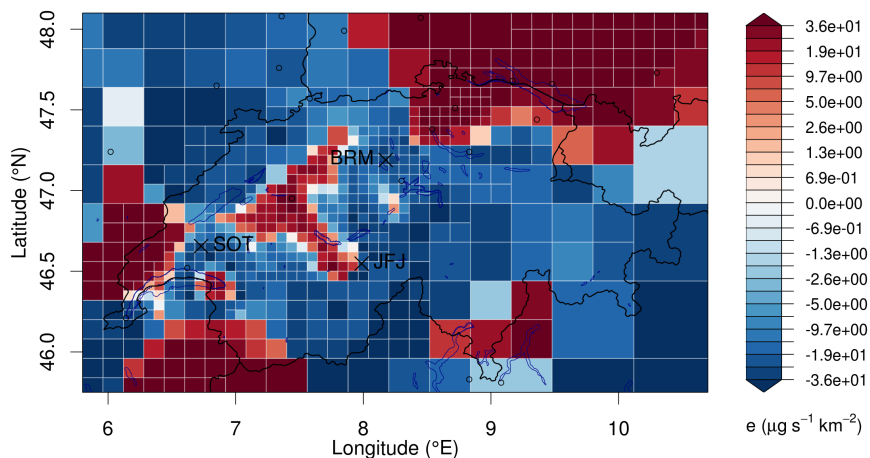

Figure S19: A-posteriori minus a-priori emission differences for HFC-32 for the inversion including both BRM and SOTT for the period 2019–2021 with the 7 km model starting from a uniform a-priori.

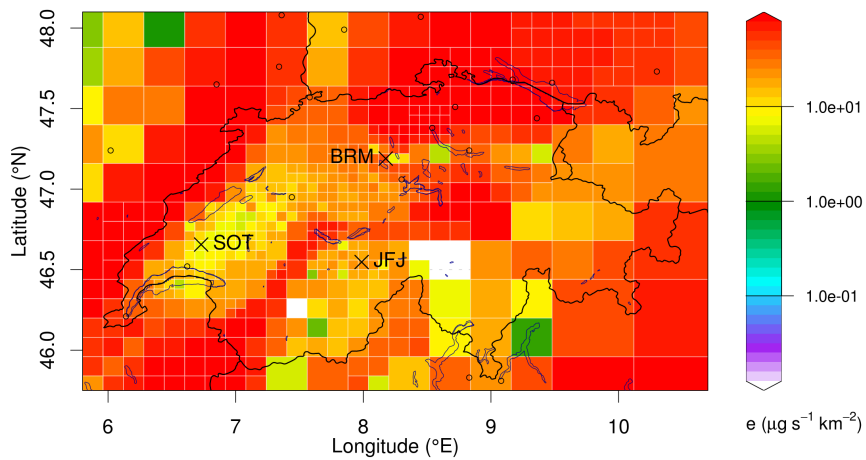

Figure S20: Spatial distribution of Swiss HFC-32 a-posteriori emissions for the inversion including both BRM and SOTT for the period 2019–2021 with the 1 km model starting from a uniform a-priori.

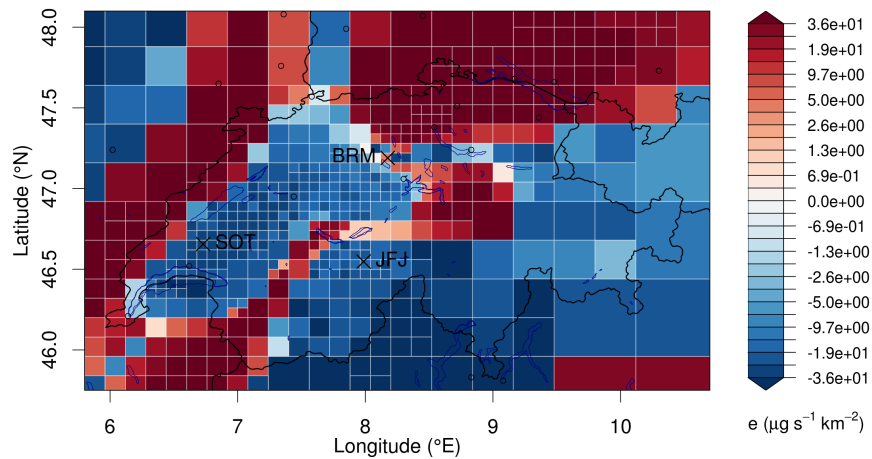

Figure S21: A-posteriori minus a-priori emission differences for HFC-32 for the inversion including both BRM and SOTT for the period 2019–2021 with the 1 km model starting from a uniform a-priori.

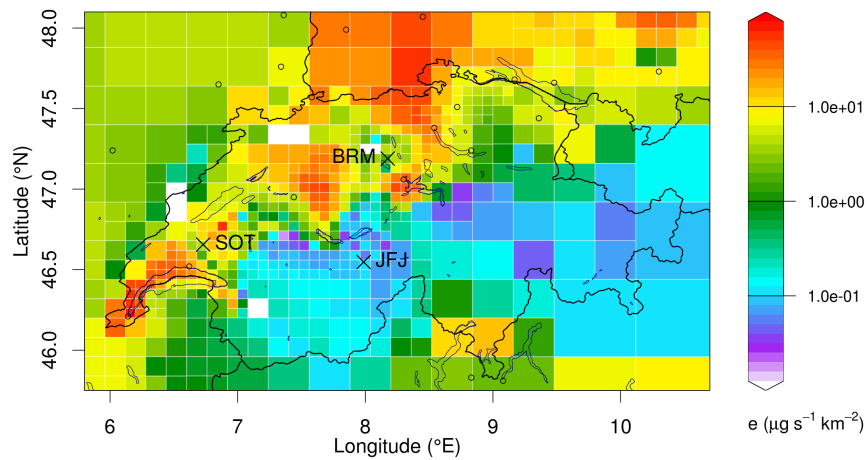

Figure S22: Spatial distribution of Swiss  $SF_6$  a-posteriori emissions for the inversion including both BRM and SOTT for the period 2019–2021 with the 7 km model starting from a uniform a-priori.

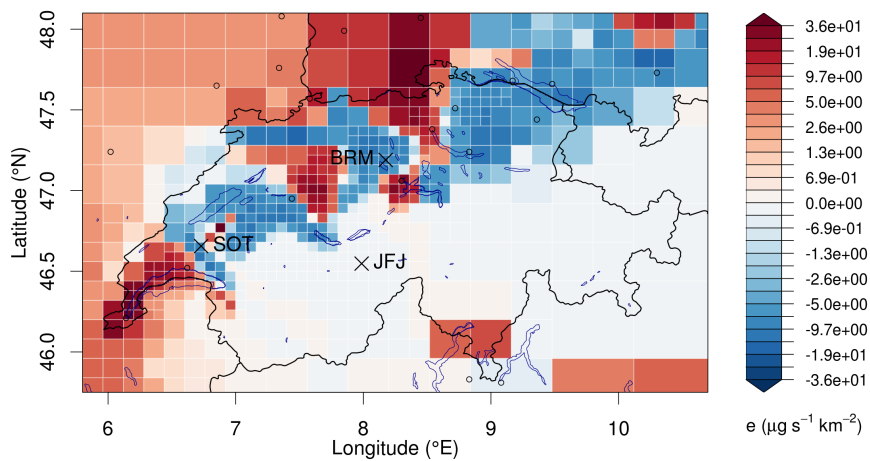

Figure S23: A-posteriori minus a-priori emission differences for SF<sub>6</sub> for the inversion including both BRM and SOTT for the period 2019–2021 with the 7 km model starting from a uniform a-priori.

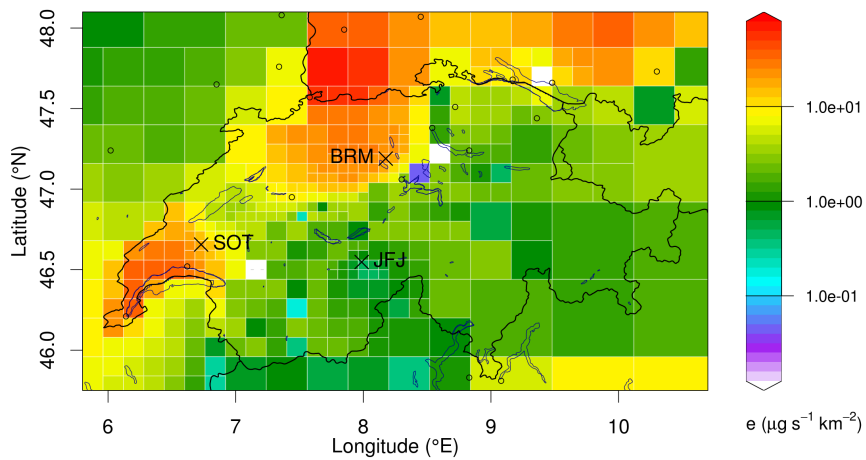

Figure S24: Spatial distribution of Swiss SF<sub>6</sub> a-posteriori emissions for the inversion including both BRM and SOTT for the period 2019–2021 with the 1 km model starting from a uniform a-priori.

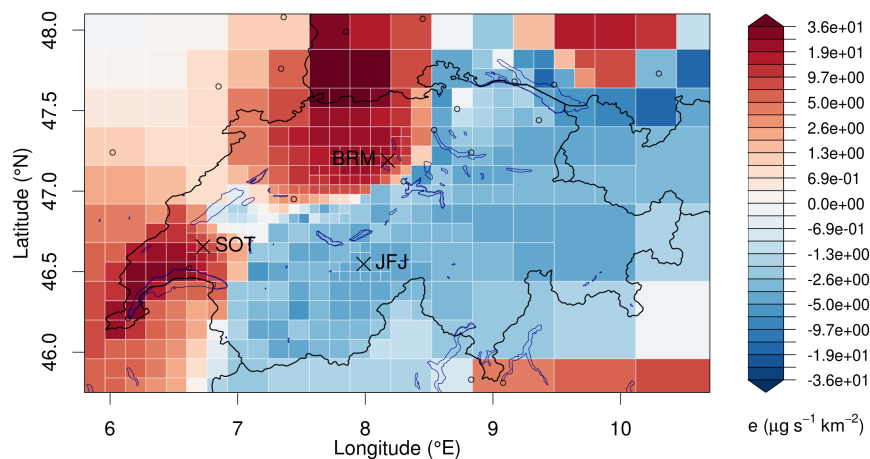

Figure S25: A-posteriori minus a-priori emission differences for SF<sub>6</sub> for the inversion including both BRM and SOTT for the period 2019–2021 with the 1 km model starting from a uniform a-priori.

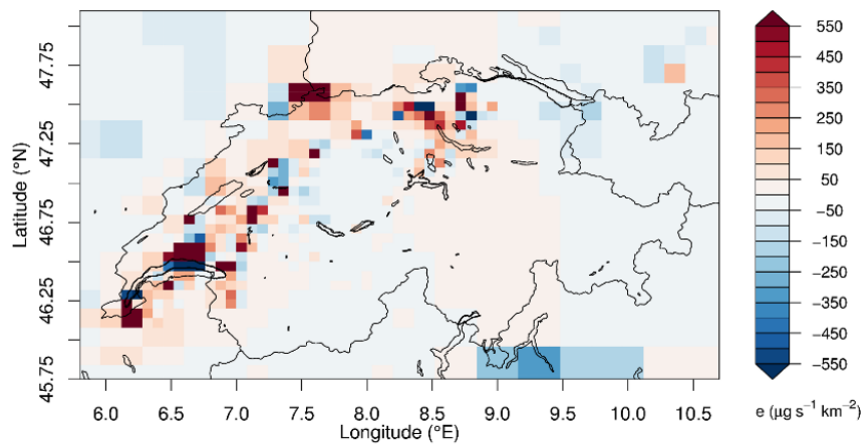

Figure S26: A-posteriori emission differences between the high- model inversions with and without SOTT for a population based a-priori for HFC-134a.

Table S1: Statistical measures used to assess the a-priori performance of the transport model for different compounds, different model resolutions, and different a-priori emission distributions. The table displays root means squared error (RMSE), and correlations of simulated compound values against observations for Beromünster (BRM) and Sottens (SOT)

| Compound        | Model Res. | A-priori      | r (BRM) | r (SOT) | RMSE (BRM)<br>(ppt) | RMSE (SOT)<br>(ppt) |
|-----------------|------------|---------------|---------|---------|---------------------|---------------------|
| HFC-134a        | C7         | Population    | 0.70    | 0.65    | 9.33                | 9.10                |
| HFC-134a        | C7         | Uniform       | 0.66    | 0.67    | 6.01                | 5.78                |
| HFC-134a        | C7         | Elevation-dep | 0.64    | 0.57    | 9.45                | 10.3                |
| HFC-134a        | C1         | Population    | 0.78    | 0.81    | 6.33                | 6.20                |
| HFC-134a        | C1         | Uniform       | 0.73    | 0.76    | 4.84                | 4.92                |
| HFC-134a        | C1         | Elevation-dep | 0.75    | 0.74    | 6.53                | 7.60                |
| HFC-125         | C7         | Population    | 0.69    | 0.63    | 1.62                | 1.94                |
| HFC-125         | C7         | Uniform       | 0.61    | 0.67    | 1.42                | 1.38                |
| HFC-125         | C7         | Elevation-dep | 0.62    | 0.52    | 1.64                | 2.16                |
| HFC-125         | C1         | Population    | 0.69    | 0.80    | 1.30                | 1.34                |
| HFC-125         | C1         | Uniform       | 0.60    | 0.77    | 1.42                | 1.19                |
| HFC-125         | C1         | Elevation-dep | 0.66    | 0.72    | 1.30                | 1.58                |
| HFC-32          | C7         | Population    | 0.61    | 0.59    | 1.98                | 2.16                |
| HFC-32          | C7         | Uniform       | 0.61    | 0.62    | 1.66                | 2.08                |
| HFC-32          | C7         | Elevation-dep | 0.56    | 0.50    | 1.98                | 2.30                |
| HFC-32          | C1         | Population    | 0.68    | 0.77    | 1.55                | 1.67                |
| HFC-32          | C1         | Uniform       | 0.65    | 0.74    | 1.61                | 1.93                |
| HFC-32          | C1         | Elevation-dep | 0.64    | 0.70    | 1.60                | 1.84                |
| SF <sub>6</sub> | C7         | Population    | 0.51    | 0.41    | 0.183               | 0.293               |
| SF <sub>6</sub> | C7         | Uniform       | 0.50    | 0.37    | 0.189               | 0.312               |
| SF <sub>6</sub> | C7         | Elevation-dep | 0.50    | 0.37    | 0.181               | 0.298               |
| SF <sub>6</sub> | C1         | Population    | 0.60    | 0.49    | 0.173               | 0.290               |
| SF <sub>6</sub> | C1         | Uniform       | 0.58    | 0.43    | 0.188               | 0.310               |
| SF <sub>6</sub> | C1         | Elevation-dep | 0.59    | 0.42    | 0.173               | 0.294               |



Table S2: Statistical measures used to assess the reliability of inversion for different compounds, different transport model resolutions, different a-priori emissions, and for inversions with seasonal emissions. The table displays the reduced  $\chi^2$  index, degrees of freedom (DOF), root means squared error (RMSE), and correlations of simulated compound values against observations for Beromünster (BRM) and Sottens (SOT).

| Compound | Model Res. | Sensitivity | $\chi^2$ | DOF | r (BRM) | r (SOT) | RMSE (BRM)<br>(ppt) | RMSE (SOT)<br>(ppt) |
|----------|------------|-------------|----------|-----|---------|---------|---------------------|---------------------|
| HFC-134a | C7         | SEAS1       | 0.89     | 252 | 0.78    | 0.81    | 4.2                 | 4.3                 |
| HFC-134a | C7         | SEAS2       | 1.40     | 329 | 0.73    | 0.76    | 4.7                 | 4.8                 |
| HFC-134a | C1         | SEAS1       | 0.90     | 199 | 0.85    | 0.85    | 3.5                 | 3.9                 |
| HFC-134a | C1         | SEAS2       | 1.30     | 303 | 0.81    | 0.81    | 3.9                 | 4.4                 |
